# Supplementary material for: Physiology and behavior under food limitation support an escape, not preparative, response in the nomadic Pine Siskin (Spinus pinus)
Source: Oxford University Press journal article supplement (doi:10.1242/jeb.238774), 2020-01-01
Supplement: jeb238774supp.pdf [file jeb238774supp.pdf]

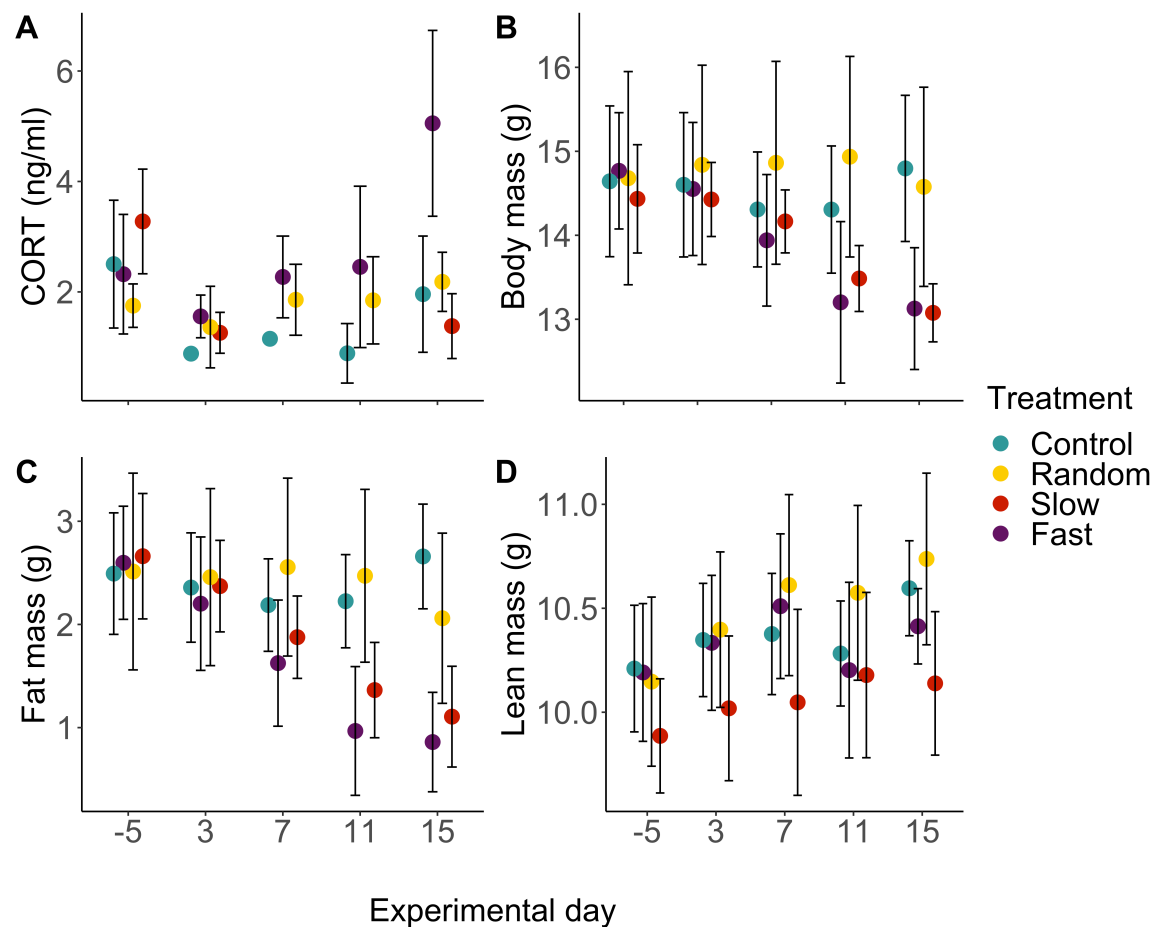

Fig. S1. Absolute values (mean  $\pm$  95% CI) of CORT, body mass, fat mass, and lean mass for each treatment group over the course of the experiment.

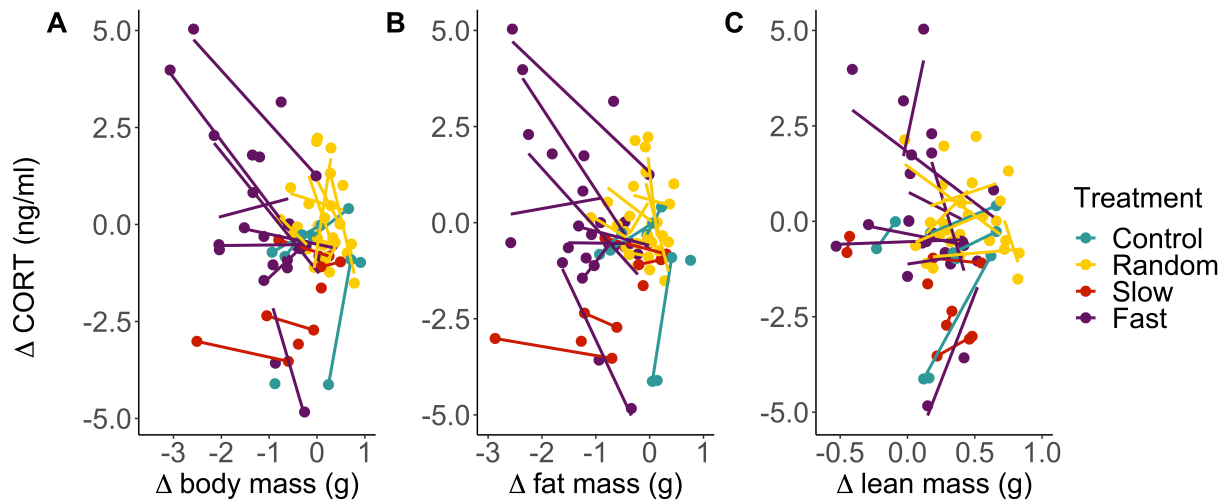

Fig. S2. Linear regressions for the relationships between  $\Delta$  CORT and (a)  $\Delta$  body mass, (b)  $\Delta$  fat mass, and (c)  $\Delta$  lean mass for each individual across the four treatment groups.
